# Supplementary material for: NIRF Optical/PET Dual-Modal Imaging of Hepatocellular Carcinoma Using Heptamethine Carbocyanine Dye
Source: Hindawi journal article supplement (doi:10.1155/2018/4979746), 2018-01-01
Supplement: f1 [file 4979746.f1.pdf]

**Supplemental Figure 1.** Spectroscopic analysis.

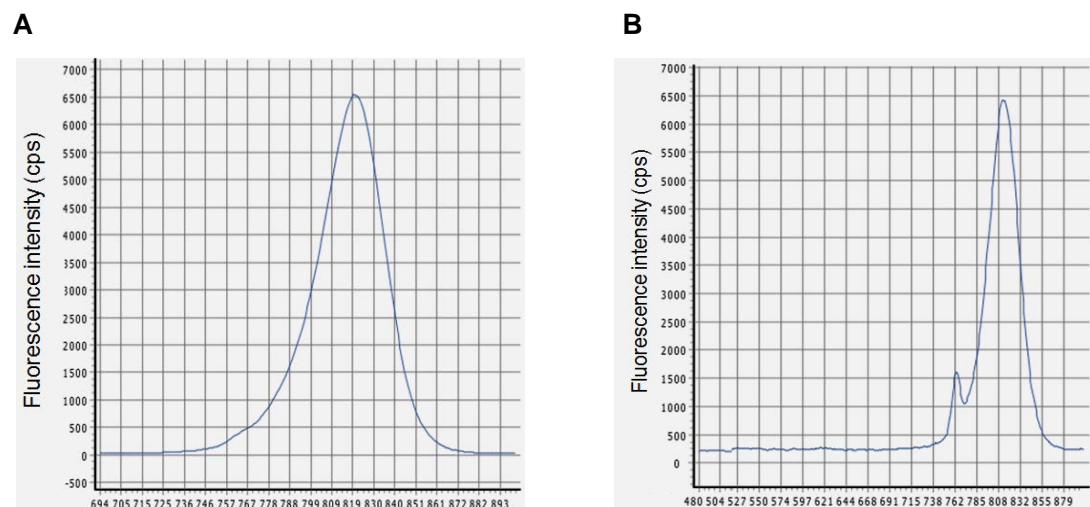

**A.** Optimization of emission wavelength of MHI-148 is 820 nm. **B.** Optimization of emission wavelength of Ga-MHI-148 is 813 nm. Optimal excitation wavelength of MHI-148 and Ga-MHI-148 are both 767 nm.

**Supplemental Figure 2.** Blood distribution of  $^{68}\text{Ga}$ -MHI-148 at 1 h.

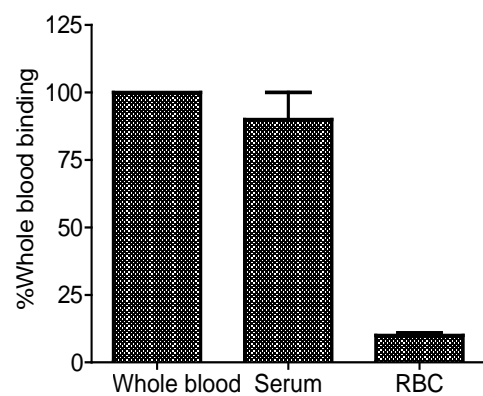

About 90% of the probe bound to the serum instead of red blood cells (n=5).

### Supplemental Figure 3. STR analysis results of tumor DNA

Tumor tissue DNA from PDX model (D68979, D49028 and D67818) was subjected to STR analysis. All 16 human-specific loci were detected signals, and the tumor DNA matched the human-specific loci >99.99% of the time, confirming that the tumors were human-derived.

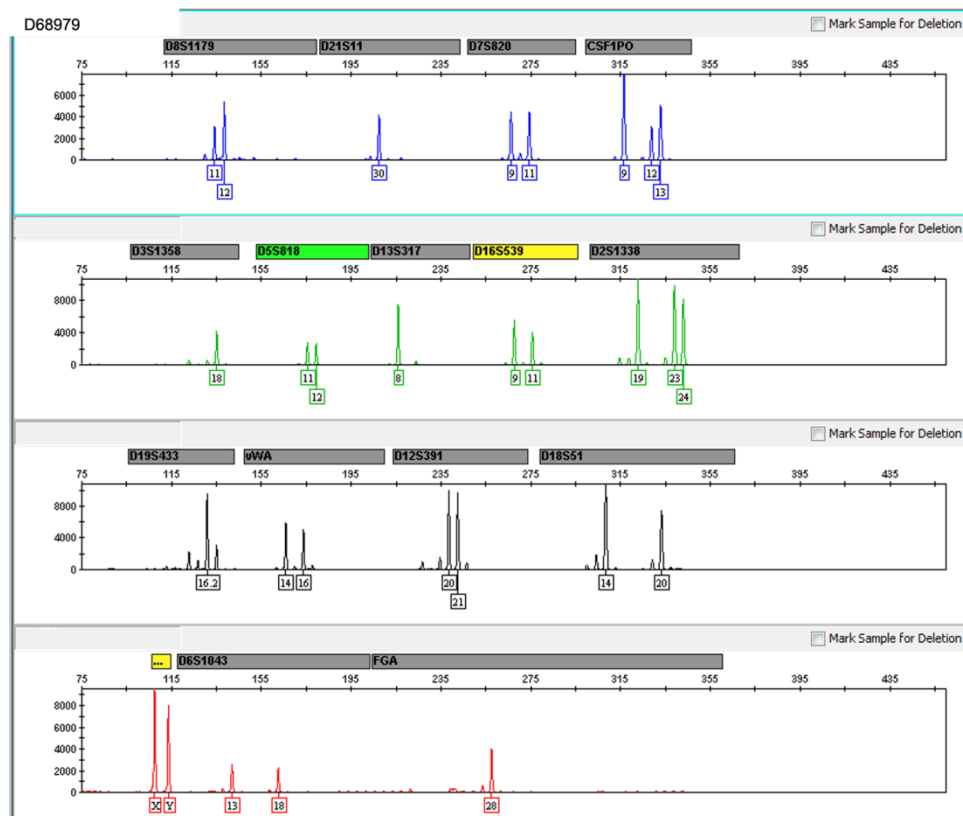

D68979

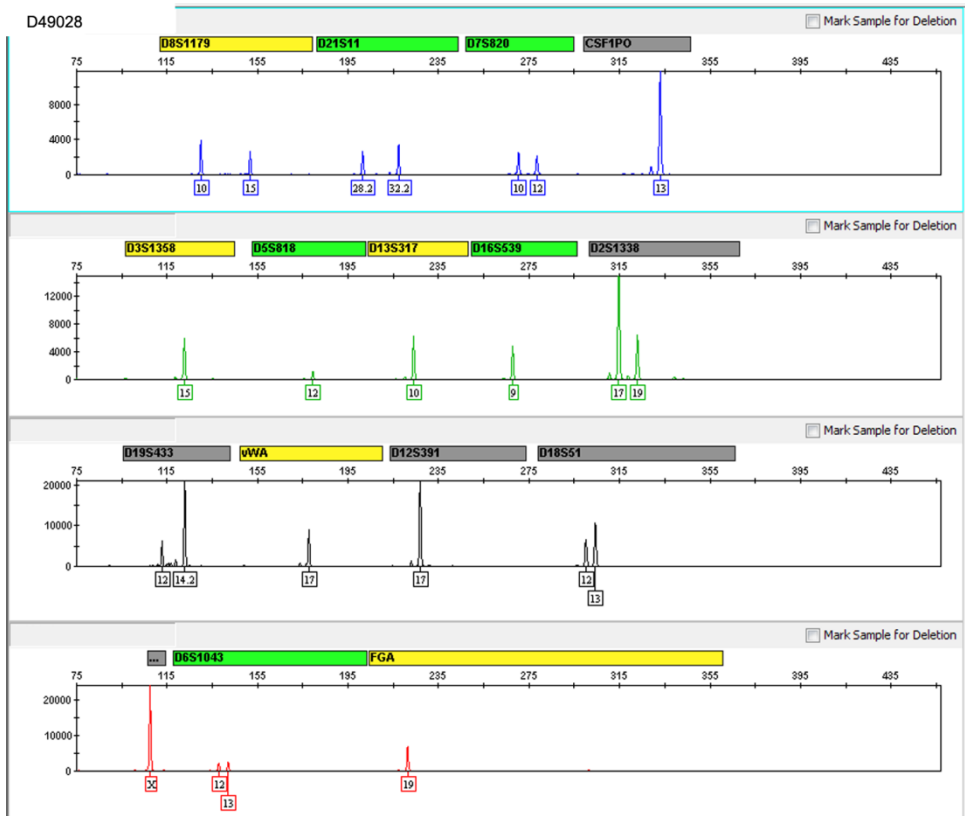

D49028

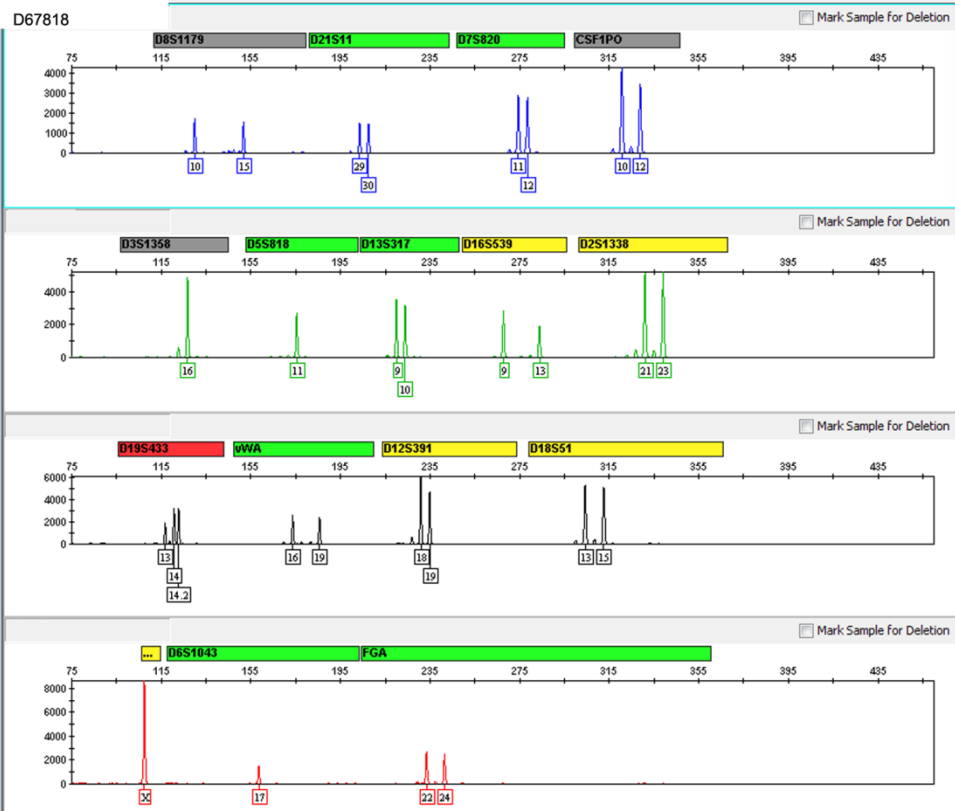

D67818
